# Supplementary material
Source: PubMed Central journal article supplement (PMC4719580)
Supplement: NIHMS747576-supplement-1.pdf [file NIHMS747576-supplement-1.pdf]

## **SUPPLEMENTAL MATERIAL**

**A systematic analysis of acceptor specificity and reaction kinetics of five human  $\alpha(2,3)$ sialyltransferases: Product inhibition studies illustrates reaction mechanism for ST3Gal-I**

Rohitesh Gupta, Khushi L. Matta and Sriram Neelamegham

## KINETICS ANALYSIS

The following sections present rate expressions for the ordered sequential bi-bi, random sequential bi-bi and ping-pong reaction mechanisms [1]:

### ORDERED SEQUENTIAL BI-BI MECHANISM

#### A. Overall expression for product formation

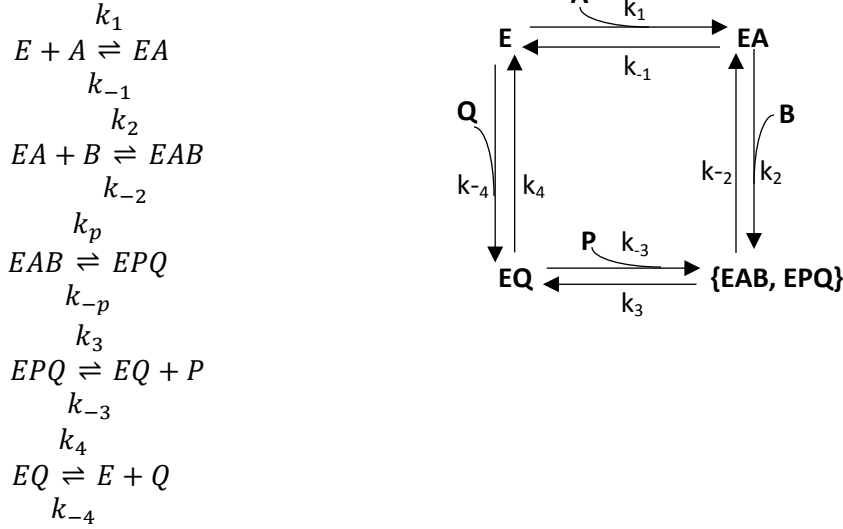

Upon solving the above set of equations algebraically using the King-Altman method, a rate expression for product formation can be derived:

$$v = \frac{V_f[A][B] - \frac{V_r[P][Q]}{K_i^Q K_M^P}}{1 + \frac{[A]}{K_i^A} + \frac{K_M^A[B]}{K_i^A K_M^B} + \frac{K_M^Q[P]}{K_i^Q K_M^P} + \frac{[Q]}{K_i^Q} + \frac{[A][B]}{K_i^A K_M^B} + \frac{K_M^Q[A][P]}{K_i^A K_M^P K_i^Q} + \frac{K_M^A[B][Q]}{K_i^A K_M^B K_i^Q} + \frac{[P][Q]}{K_i^Q K_M^P} + \frac{[A][B][P]}{K_i^A K_M^B K_i^P} + \frac{[B][P][Q]}{K_i^B K_M^P K_i^Q}}
 \quad [\text{Eq. 1}]$$

where

$$\begin{aligned}
 V_f &= \frac{k_3 k_4 E_0}{k_3 + k_4}; \quad V_r = \frac{k_{-1} k_{-2} E_0}{k_{-1} + k_{-2}}; \quad K_M^A = \frac{k_3 k_4}{k_1 (k_3 + k_4)}; \quad K_M^B = \frac{k_4 (k_{-2} + k_3)}{k_2 (k_3 + k_4)}; \\
 K_M^P &= \frac{k_{-1} (k_{-2} + k_3)}{k_{-3} (k_{-1} + k_{-2})}; \quad K_M^Q = \frac{k_{-1} k_{-2}}{k_{-4} (k_{-1} + k_{-2})}; \quad K_i^A = \frac{k_{-1}}{k_1} \\
 K_i^B &= \frac{(k_{-1} + k_{-2})}{k_2}; \quad K_i^P = \frac{(k_3 + k_4)}{k_{-3}}; \quad K_i^Q = \frac{k_4}{k_{-4}}
 \end{aligned}$$

#### B. Initial velocity rate expression

The initial reaction velocity then follows upon setting  $[P] = [Q] = 0$  in the above equation:

$$v = \frac{\frac{V_f[A][B]}{K_i^A K_M^B}}{1 + \frac{[A]}{K_i^A} + \frac{K_M^A[B]}{K_i^A K_M^B} + \frac{[A][B]}{K_i^A K_M^B}} = \frac{V_f[A][B]}{[A][B] + K_M^B[A] + K_M^A[B] + K_i^A K_M^B}$$

i.e. when [A] is varied, the above expression in double-reciprocal form is:

$$\frac{1}{v} = \frac{K_M^A}{V_f} \left( 1 + \frac{K_i^A K_M^B}{K_M^A[B]} \right) \frac{1}{[A]} + \frac{1}{V_f} \left( 1 + \frac{K_M^B}{[B]} \right)$$

[Eq. 2a]

When [B] is varied, the above expression becomes:

$$\frac{1}{v} = \frac{K_M^B}{V_f} \left( 1 + \frac{K_i^A}{[A]} \right) \frac{1}{[B]} + \frac{1}{V_f} \left( 1 + \frac{K_M^A}{[A]} \right)$$

[Eq. 2b]

This expression is similar to the standard equation used for the Lineweaver Burk Plot:

$$\frac{1}{v} = \frac{K_{M,app}}{V_{app}} \frac{1}{[A]} + \frac{1}{V_{app}}$$

In both the above equations, both the slope and intercept change upon varying [A] or [B]. The intercept lies above, at or below the x-axis depends on the relative values of  $K_i^A$  versus  $K_M^A$ .

### C. Product inhibition

In the case of product inhibition, [A] is set to be the variable and [B] is fixed. Here, if [P] is finite and [Q]=0, it follows that:

$$v = \frac{\frac{V_f[A][B]}{K_i^A K_M^B}}{1 + \frac{[A]}{K_i^A} + \frac{K_M^A[B]}{K_i^A K_M^B} + \frac{K_M^Q[P]}{K_i^Q K_M^P} + \frac{[A][B]}{K_i^A K_M^B} + \frac{K_M^Q[A][P]}{K_i^A K_M^P K_i^Q} + \frac{[A][B][P]}{K_i^A K_M^B K_i^P}}$$

$$v = \frac{\frac{V_f[A][B]}{K_i^A K_M^B}}{\left[ 1 + \frac{K_M^A[B]}{K_i^A K_M^B} + \frac{K_M^Q[P]}{K_i^Q K_M^P} \right] + \frac{[A]}{K_i^A} \left[ 1 + \frac{[B]}{K_M^B} + \frac{K_M^Q[P]}{K_M^P K_i^Q} + \frac{[B][P]}{K_M^B K_i^P} \right]}$$

$$\frac{1}{v} = \frac{K_M^A}{V_f} \left[ 1 + \frac{K_i^A K_M^B}{[B] K_M^A} \left( 1 + \frac{K_M^Q[P]}{K_i^Q K_M^P} \right) \right] \frac{1}{[A]} + \frac{1}{V_f} \left[ 1 + \frac{K_M^B}{[B]} \left( 1 + \frac{K_M^Q[P]}{K_M^P K_i^Q} \right) + \frac{[P]}{K_i^P} \right]$$

[Eq. 3a]

Here, both the apparent  $K_M$  and  $V_{max}$  are functions of [P]. Similar to above, in the case of product inhibition when [A] is set to be variable and [B] is fixed, [P]=0 and [Q] is finite, it follows that:

$$v = \frac{\frac{V_f[A][B]}{K_i^A K_M^B}}{1 + \frac{[A]}{K_i^A} + \frac{K_M^A[B]}{K_i^A K_M^B} + \frac{[Q]}{K_i^Q} + \frac{[A][B]}{K_i^A K_M^B} + \frac{K_M^A[B][Q]}{K_i^A K_M^B K_i^Q}}$$

or

$$v = \frac{\frac{V_f[A][B]}{K_i^A K_M^B}}{\left[1 + \frac{K_M^A[B]}{K_i^A K_M^B} + \frac{[Q]}{K_i^Q} + \frac{K_M^A[B][Q]}{K_i^A K_M^B K_i^Q}\right] + \frac{[A]}{K_i^A} \left[1 + \frac{[B]}{K_M^B}\right]}$$

$$\frac{1}{v} = \frac{K_M^A}{V_f} \left[ \left(1 + \frac{[Q]}{K_i^Q}\right) \left(1 + \frac{K_i^A K_M^B}{[B] K_M^A}\right) \right] \frac{1}{[A]} + \frac{1}{V_f} \left[1 + \frac{K_M^B}{[B]}\right]$$

[Eq. 3b]

Here, only the apparent  $K_M$  is a function of [Q] and thus this is a type of competitive inhibition. In addition, if the product inhibition type is mixed when [A] is set to be variable and [B] is fixed, [P]=0 and [Q] is finite, the schematic stated below describes enzymatic mechanism.

The set of enzymatic equations solved algebraically using King-Altman method results in the rate expression with both apparent  $K_M$  and  $V_{max}$  as the function of [Q].

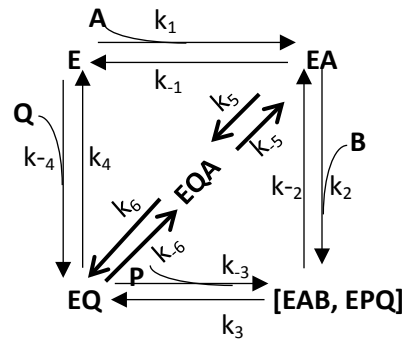

$$\frac{1}{v} = \frac{K_M^A}{V_f} \left(1 + \frac{K_i^A K_M^B}{[B] K_M^A}\right) \left[ \left(1 + \frac{[Q]}{K_i^Q}\right) \right] \frac{1}{[A]} + \frac{1}{V_f} \left( K_i^{PQ} + \frac{K_M^B}{[B]} \right) \left[ 1 + \frac{[Q]}{K_i^{QA} \left[1 + \frac{[B]}{K_i^{PQ} K_M^B}\right]} \right]$$

[Eq. 3c]

where

$$V_f = \frac{k_3 E_0}{k_1}; K_M^A = \frac{k_3}{k_1}; K_M^B = \frac{(k_{-2} + k_3)}{k_2}; K_i^A = \frac{k_{-1}}{k_1}$$

$$K_i^{QA} = \frac{k_{-5}}{k_5}; K_i^{PQ} = \frac{k_4}{(k_3 + k_4)}; K_i^Q = \frac{k_4}{k_{-4}}$$

## RANDOM SEQUENTIAL BI-BI MECHANISM

### A. Overall expression for product formation

The rate expression here is similar that of the ordered sequential bi-bi reaction, only simpler since many of the steps are in rapid equilibrium:

$$v = \frac{\frac{V_f[A][B]}{K_i^A K_M^B} - \frac{V_r[P][Q]}{K_i^Q K_M^P}}{1 + \frac{[A]}{K_i^A} + \frac{[B]}{K_i^B} + \frac{[P]}{K_i^P} + \frac{[Q]}{K_i^Q} + \frac{[A][B]}{K_i^A K_M^B} + \frac{[P][Q]}{K_i^Q K_M^P}}$$

[Eq.4]

### B. Initial velocity rate expression

The initial reaction velocity follows by setting [P]=[Q]=0:

$$v = \frac{\frac{V_f[A][B]}{K_i^A K_M^B}}{1 + \frac{[A]}{K_i^A} + \frac{[B]}{K_i^B} + \frac{[A][B]}{K_i^A K_M^B}} = \frac{V_f[A][B]}{[A][B] + K_M^B[A] + \frac{K_i^A K_M^B[B]}{K_i^B} + K_i^A K_M^B}$$

When [A] is varied, the above expression in double-reciprocal form is:

$$\frac{1}{v} = \frac{1}{V_f} \left( \frac{K_i^A K_M^B}{K_i^B} + \frac{K_i^A K_M^B}{[B]} \right) \frac{1}{[A]} + \frac{1}{V_f} \left( 1 + \frac{K_M^B}{[B]} \right)$$

[Eq.5]

In the above equations, both the slope and intercept change upon varying [B].

### C. Product inhibition

For product inhibition [P]=0 and [Q] is finite. In this case, when [A] is set to be the variable and [B] is fixed:

$$v = \frac{\frac{V_f[A][B]}{K_i^A K_M^B}}{1 + \frac{[A]}{K_i^A} + \frac{[B]}{K_i^B} + \frac{[Q]}{K_i^Q} + \frac{[A][B]}{K_i^A K_M^B}}$$

$$\frac{1}{v} = \frac{K_i^A K_M^B}{V_f[A][B]} \left( 1 + \frac{[B]}{K_i^B} + \frac{[Q]}{K_i^Q} \right) + \frac{K_M^B}{V_f[B]} \left( 1 + \frac{[B]}{K_M^B} \right)$$

[Eq.6]

## PING-PONG REACTION

### A. Overall expression for product formation

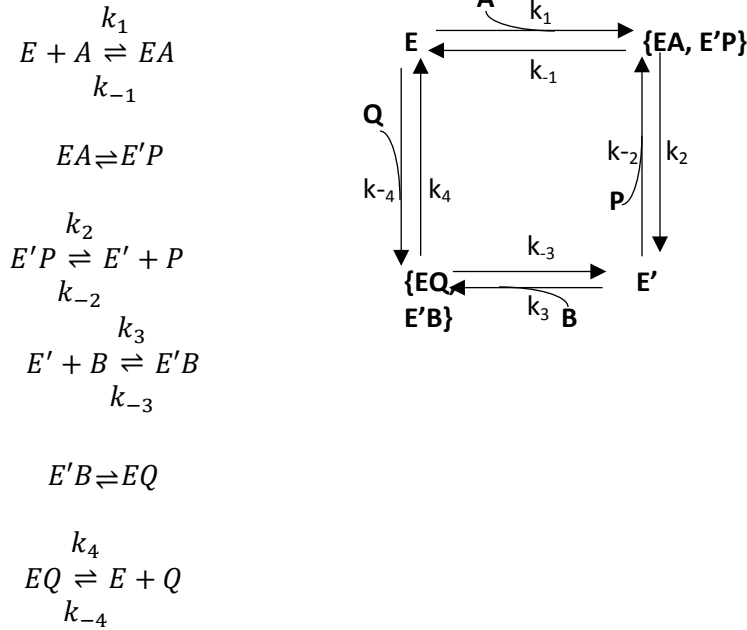

Upon solving the above set of equations algebraically, a rate expression for product formation can be derived:

$$v = \frac{\frac{V_f[A][B]}{K_i^A K_M^B} - \frac{V_r[P][Q]}{K_i^P K_M^Q}}{\frac{[A]}{K_i^A} + \frac{K_M^A[B]}{K_i^A K_M^B} + \frac{[P]}{K_i^P} + \frac{K_M^P[Q]}{K_i^P K_M^Q} + \frac{[A][B]}{K_i^A K_M^B} + \frac{[A][P]}{K_i^A K_M^P} + \frac{K_M^A[B][Q]}{K_i^A K_M^B K_i^Q} + \frac{[P][Q]}{K_i^P K_M^Q}} \quad [\text{Eq. 7}]$$

where

$$\begin{aligned}
 V_f &= \frac{k_2 k_4 E_0}{k_2 + k_4}; \quad V_r = \frac{k_{-1} k_{-3} E_0}{k_{-1} + k_{-3}}; \quad K_M^A = \frac{(k_{-1} + k_2) k_4}{k_1 (k_2 + k_4)}; \quad K_M^B = \frac{k_2 (k_{-3} + k_4)}{k_3 (k_2 + k_4)}; \\
 K_M^P &= \frac{k_{-3} (k_{-1} + k_2)}{k_{-2} (k_{-1} + k_{-3})}; \quad K_M^Q = \frac{k_{-1} (k_{-3} + k_4)}{k_{-4} (k_{-1} + k_{-3})}; \quad K_i^A = \frac{k_{-1}}{k_1} \\
 K_i^B &= \frac{k_{-3}}{k_3}; \quad K_i^P = \frac{k_2}{k_{-2}}; \quad K_i^Q = \frac{k_4}{k_{-4}}
 \end{aligned}$$

### B. Initial velocity rate expression

At the initial time point,  $[P]=[Q]=0$  and thus when  $[A]$  is varied:

$$v = \frac{V_f[A][B]}{K_i^A K_M^B}$$

$$v = \frac{[A]}{K_i^A} + \frac{K_M^A[B]}{K_i^A K_M^B} + \frac{[A][B]}{K_i^A K_M^B}$$

$$\frac{1}{v} = \frac{1}{[A]} \frac{K_M^A}{V_f} + \frac{1}{V_f} \left( \frac{K_M^B}{[B]} + 1 \right)$$

[Eq. 8]

Upon changing [B], Lineweaver Burk plot results in a series of lines with identical slope.

**Reference:**

1. Segel, I., *Enzyme kinetics*. 1975, John Wiley & Sons, Inc.: United States of America. p. 560-621.

| Table S1: Substrates used for enzymology                                            |                                                              |         |
|-------------------------------------------------------------------------------------|--------------------------------------------------------------|---------|
| Structures                                                                          | Glycan Type                                                  | *       |
| 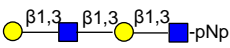   | <b>Type-I</b><br>Galβ1,3GlcNAcβ1,3lac-pNp                    | [1]     |
|    | 2-O-MeGalβ1,3GlcNAc-OBn                                      | [1a]    |
|    | <b>Type-II</b><br>Galβ1,4GlcNAcβ1,3Gal-pNp                   | [2]     |
|    | Galβ1,4GlcNAcβ1,3Galβ1,4GlcNAc-pNp                           | [2a]    |
|    | 4-O-MeGalβ1,4GlcNAc-OBn                                      | [2b]    |
|    | Galβ1,4GlcNAcβ1,6(4FGalβ1,3)GalNAc-OBn                       | [2c]    |
|    | <b>Type-III</b><br>Galβ1,3GalNAc-OBn                         | [3]     |
|    | 3-O-MeGalβ1,3GalNAc-OBn                                      | [3a]    |
|    | Galβ1,3GalNAcβ1,3Gal-Nap                                     | [3b]    |
|   | Galβ1,3(GlcNAc β1,6)GalNAc-OBn                               | [4]     |
|  | NeuAcα2,3Galβ1,3(3OSulfo)Galβ1,4(Fuca1,3)GlcNAcβ1,6GalNAc-Me | [Sia4a] |

\* The corresponding Neu5Ac terminated glycans are referred to as [Sia1], [Sia2], [Sia3], [Sia4] etc.



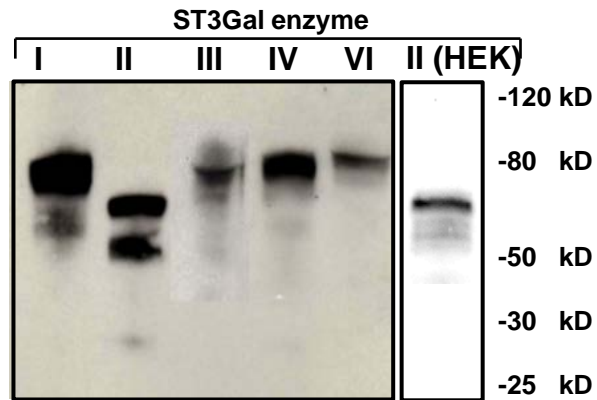

**Figure S1. Sialyltransferase expression** – Western blot detected the ST3Gal fusion proteins using HRP conjugated anti-human Fc Ab. All enzymes were purified from CHO cell culture media using nickel-chelate column, except for ST3Gal-II which was also obtained from HEK cells.

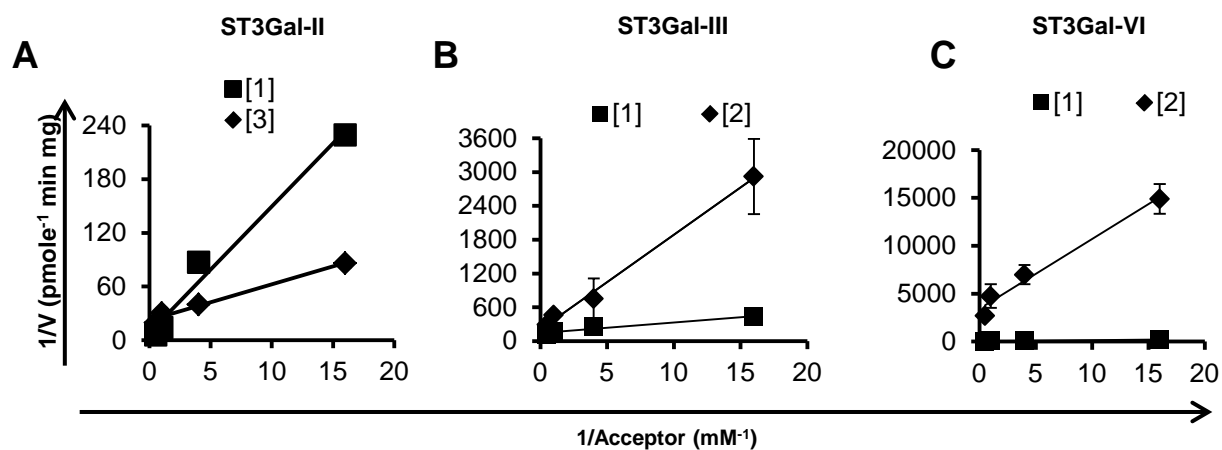

**Figure S2. Kinetic analysis for sialylTs – A – C.** Lineweaver-Burk plot for 0.24mU/mL ST3Gal-II, 0.05mU/mL ST3Gal-III and 0.063mU/mL ST3Gal-VI, respectively. In all cases, reactions contained 0.0625-2.0mM of either acceptor [1] or [2] or [3] as indicated, along with 0.5mM CMP-Neu5Ac.

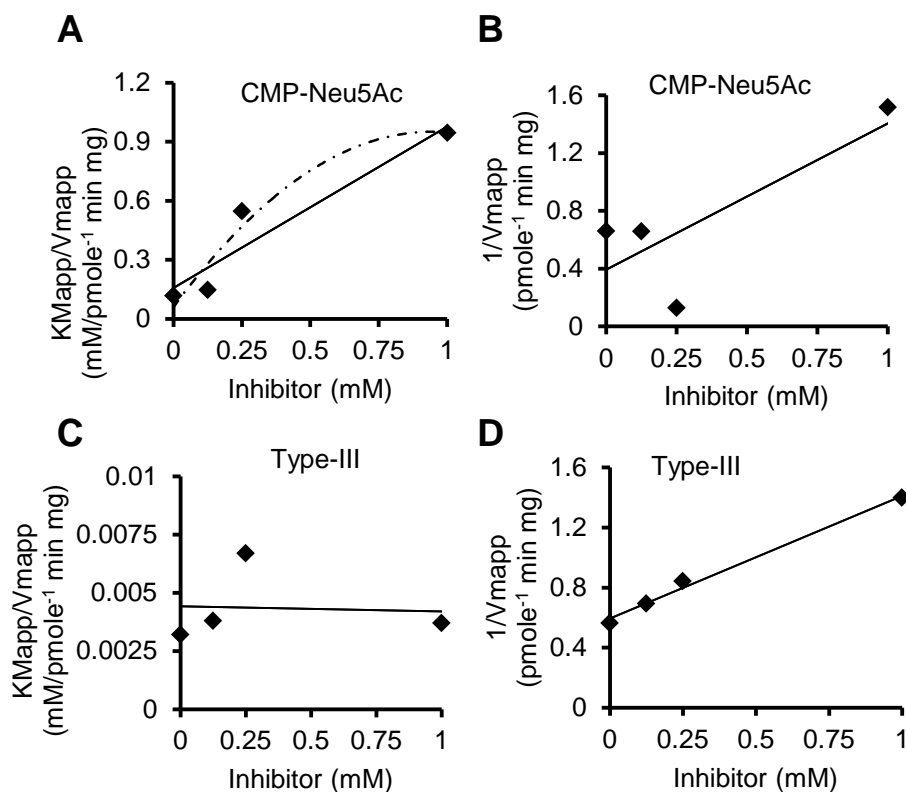

**Figure S3. Secondary plots for inhibition reactions** – **A.** Secondary plots obtained from the Lineweaver-Burk plots generated by varying CMP-Neu5Ac in the presence of 5’CMP. Hyperbolic profile indicates partial effect of inhibitor. **B.**  $1/V_{Mapp}$  vs inhibitor 5’-CMP together with the response in **A** suggests partially mixed or competitive inhibition. **C.** and **D.** Secondary plots obtained by varying Gal $\beta$ 1,3GalNAc suggests uncompetitive inhibition with 5’CMP. Equation 5 described in methods illustrates these plots.

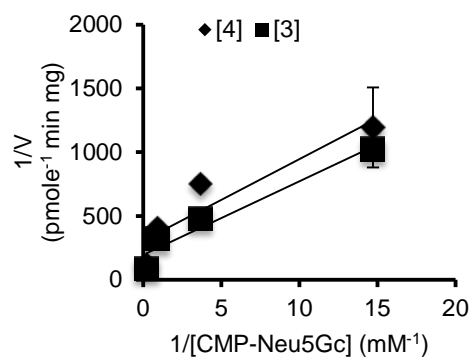

**Figure S4. Kinetic analysis based on CMP-Neu5Gc** – Lineweaver-Burk plot upon varying CMP-Neu5Gc at fixed concentrations of 1mM [3] and [4] in the presence of 0.1 mU/mL ST3Gal-I.
